# Supplementary material for: Light-responsive hyaluronic acid nanomicelles co-loaded with an IDO inhibitor focus targeted photoimmunotherapy against “immune cold” cancer
Source: Royal Society of Chemistry journal article supplement (doi:10.1039/d1bm01409a), 2021-01-01
Supplement: d1bm01409a1.pdf [file d1bm01409a1.pdf]

## **Light-responsive Hyaluronic Acid Nanomicelles Coloaded with IDO Inhibitor Focus Targeted Photoimmunotherapy Against “Immune Cold” Cancer**

Chunhui Wu <sup>a,#,\*</sup>, Jiming Xu <sup>a,#</sup>, Zhengxin Xie <sup>a</sup>, Honglin Huang <sup>a</sup>, Ningxi Li <sup>a</sup>, Xiaodan Wei <sup>a</sup>, Tingting Li <sup>a</sup>, Hong Yang <sup>a</sup>, Shun Li <sup>a</sup>, Xiang Qin <sup>a</sup>, Yiyao Liu <sup>a,b,\*</sup>

<sup>a</sup> *Department of Biophysics, School of Life Science and Technology, University of Electronic Science and Technology of China, Chengdu 610054, China*

<sup>b</sup> *TCM Regulating Metabolic Diseases Key Laboratory of Sichuan Province, Hospital of Chengdu University of Traditional Chinese Medicine, Chengdu 610072, China*

# The authors contribute equally.

\*Corresponding authors: [wuchunhui@uestc.edu.cn](mailto:wuchunhui@uestc.edu.cn) or [liyiyao@uestc.edu.cn](mailto:liyiyao@uestc.edu.cn)

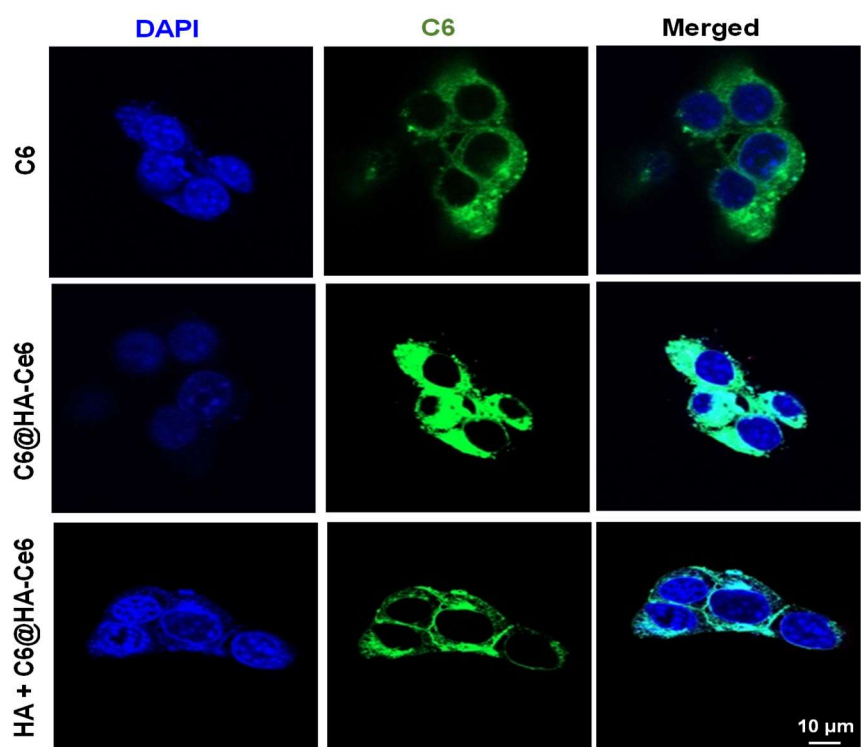

**Fig. S1.** Confocal fluorescence microscopic images of 4T1 cells incubated with C6 and C6@HA-Ce6 in the absence and presence of HA for 6 h.

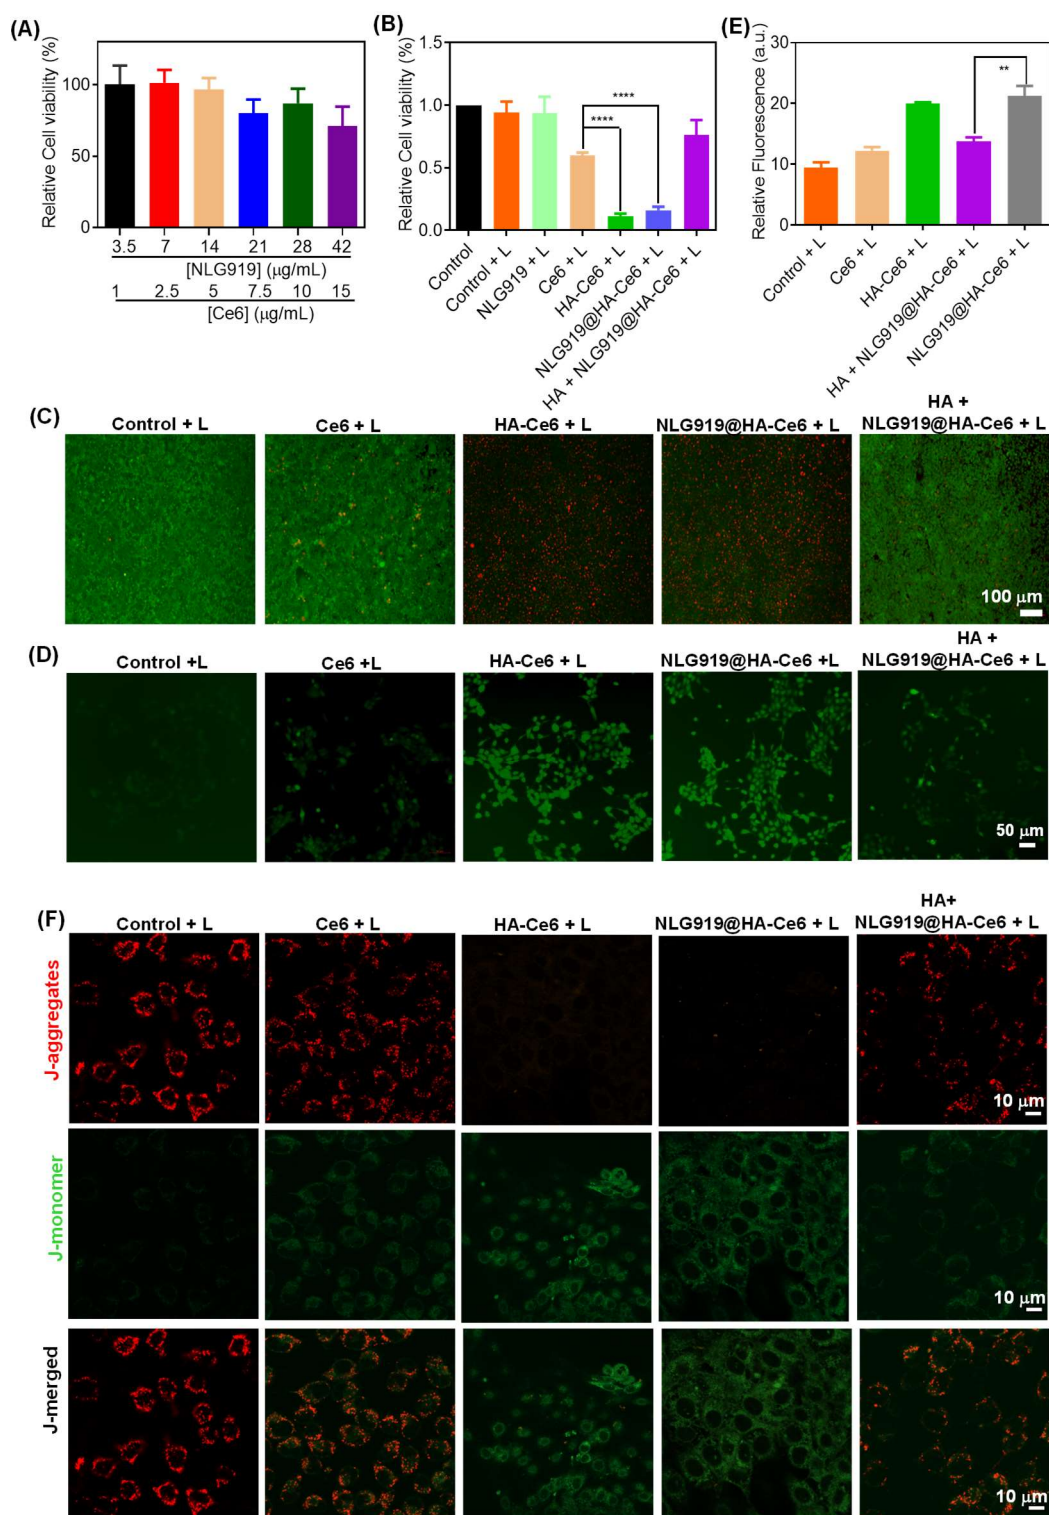

**Fig. S2.** The relative cell viability of EMT-6 cells incubated with free Ce6, HA-Ce6 and NLG919@HA-Ce6 (A) in dark and (B) under irradiation with a laser (660 nm, 1.0 W/cm<sup>2</sup>, 8 min); (C) The fluorescence microscopic images of 4T1 cells with different treatments and stained with Calcein acetoxymethyl ester (Calcein-AM) and Propidium Iodide (PI); (D) The fluorescence microscopic images of 4T1 cells incubated with DCF-DA and various nanoformulations; (E)

Quantitative comparison of the DCF-DA fluorescence for each group; (F) Confocal microscopic images of 4T1 cells stained with JC-1 after treatment with medium, Ce6, HA-Ce6 and NLG919@HA-Ce6 for 6 h and then irradiated with a laser (660 nm, 1.0 W/cm<sup>2</sup>, 8 min). Letter L denotes as laser.

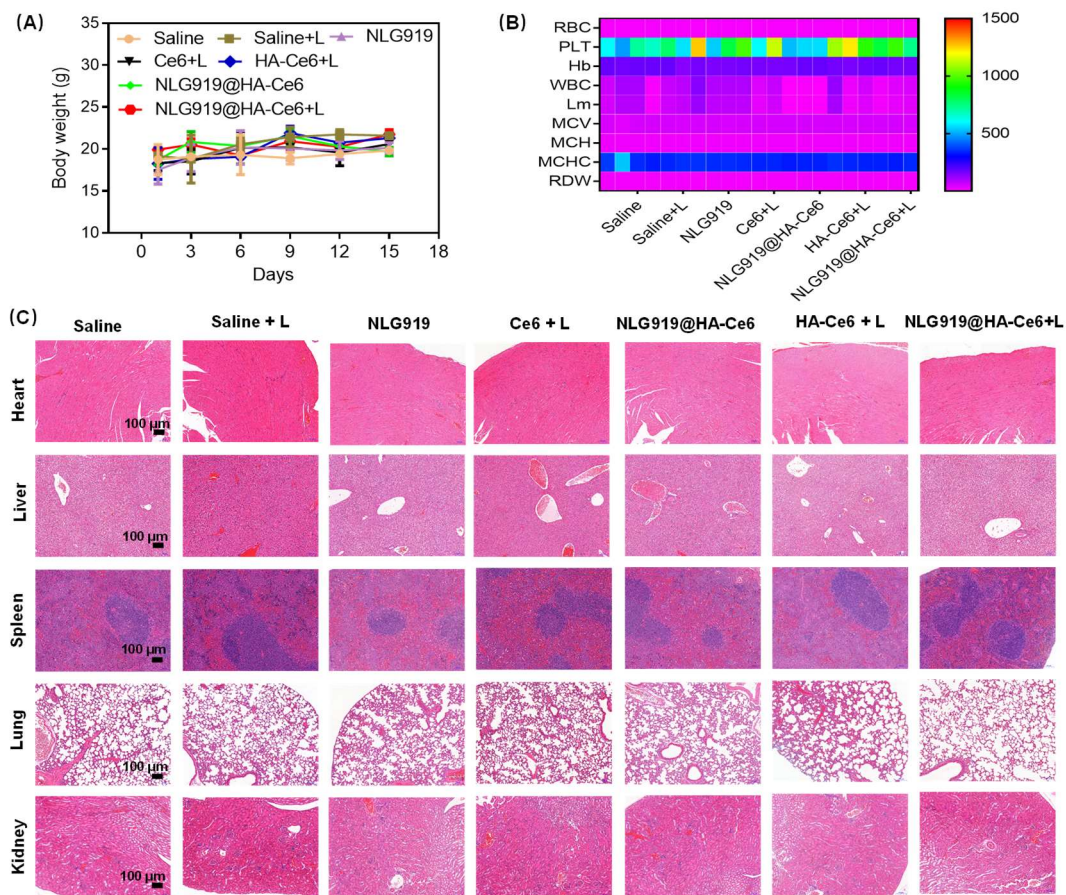

**Fig. S3.** Biosafety Analysis. (A) body weight of mice bearing 4T1 tumors treated with different formulations, (B) the hematological parameters and (C) H&E staining of the normal organs of the mice after various treatments. Letter L denotes as laser.
